# Supplementary material for: Superionic-like Diffusion in Yttrium Dihydride
Source: Research Square preprint supplement (doi:10.21203/rs.3.rs-5695082/v1), 2025-04-10
Supplement: Supplementary file 1 [file ec8078425c0c59557c4d09fc.docx]

**Supplemental Material**

**Superionic-like Diffusion in Yttrium Dihydride**

Yuqing Huang§,•, Jianguo Yu†, M.N. Cinbiz¶ and Jacob Eapen§••

§Department of Nuclear Engineering, North Carolina State University, Raleigh, NC 27695

†Fuels Modeling and Simulation, Idaho National Laboratory, Idaho Falls, ID 83402

¶Materials Science and Technology Division, Oak Ridge National Laboratory, TN 37830

• hyuqing@ncsu.edu, •• [jeapen@ncsu.edu](mailto:jeapen@ncsu.edu)

**Figure S1.** Comparison of partial radial distribution functions with the PBE functional (PB) with the AM05 functional (AM).
